# Supplementary material
Source: publisher figshare collection journal article supplement (https://sage.figshare.com/ndownloader/files/15604079)
Supplement: Supplementary file 1 [file 15604079]

**Supplementary Tables**

**Supplementary Table S1.** Clinical and endoscopic features, surgical approach and follow up of case reports of rectal Schwannomas

| **Study, year [ref.]** | **Age, gender** | **Symptoms** | **Endoscopic appearance** | **Distance from the anal verge (cm)** | **Lesion size (cm)** | **Surgical approach** | **Follow up** |
| --- | --- | --- | --- | --- | --- | --- | --- |
| Miettinem, 2001 [S1] | 82, M | NA | Submucosal nodule | NA | 0.5 | Endoscopic polypectomy | No LR at 211 months |
|  |  |  |  |  |  |  |  |
| Akgul, 2003 [S2] | 57, F | Chronic rectal pain | Sessile rectal mass | NA (lower rectum) | 6.5 | Open rectal resection | No LR at 12 months |
|  |  |  |  |  |  |  |  |
| Mulchandani, 2005 [S3] | 70, M | Rectal bleeding | Submucosal mass | 4 | 12 | Open rectal resection | No LR at 6 months |
|  |  |  |  |  |  |  |  |
| Lee, 2006 [S4] | 61, F | Rectal bleeding | Submucosal nodule | NA | 4 | Trans-anal excision | NA |
|  |  |  |  |  |  |  |  |
| Suzuki, 2014 [S5] | 70, F | No symptoms | Submucosal nodule | 10 | 2.8 | TEM | No LR at 6 months |
|  |  |  |  |  |  |  |  |
| Goh, 2008 [S6] | 41, F | Rectal bleeding | Submucosal nodule | NA | 2.9 | Trans-anal excision | No LR at 20 months |
|  |  |  |  |  |  |  |  |
| Shelat, 2013 [S7] | 63, F | Loss of appetite | Broad-base polyp | NA (upper rectum) | 4 | Open rectal resection | No LR at 36 months |
|  |  |  |  |  |  |  |  |
| Kawaguchi, 2014 [S8] | 77, F | Anal pain | Submucosal nodule | NA (upper rectum) | 2 | ESD | No LR at 24 months |
|  |  |  |  |  |  |  |  |
| Tan, 2012 [S9] | 63, F | Loss of appetite | Broad-base polyp | NA (upper rectum) | 3 | Open rectal resection | NA |
|  |  |  |  |  |  |  |  |
| Vijayasekaran, 2012 [S10] | 75, F | No symptoms | Submucosal nodule | NA | 3.2 | Open rectal resection | NA |
|  |  |  |  |  |  |  |  |
| Tedeschi, 2011 [S11] | 80, F | Rectal bleeding | Broad-base polyp | 13 | 4 | Open rectal excision | No LR at 24 months |
|  |  |  |  |  |  |  |  |
| Bhardwaj, 2002 [S12] | 35, F | Difficult defecation | Protruding mass | 10 | 2.3 | Open rectal resection | No LR at 24 months |
|  |  |  |  |  |  |  |  |
| Maciejewski, 2000 [S13] | 67, F | Abdominal pain | Submucosal mass | NA (lower rectum) | 8 | Open rectal resection | No LR at 144 months |
|  |  |  |  |  |  |  |  |
| Hsu, 2010 [S14] | 88, F | Difficult defecation | Submucosal mass | 4 | 3.5 | Trans-anal excision | No LR at 9 months |
|  |  |  |  |  |  |  |  |
| Zippi, 2013 [S15] | 72, M | Abdominal pain | Sessile polyp | 1 | 1.5 | Endoscopic polypectomy | No LR at 6 months |
|  |  |  |  |  |  |  |  |
| Kakizoe, 1998 [S16] | 72, M | No symptoms | Submucosa lesion | 10 | 1.5 | TEM | NA |
|  |  |  |  |  |  |  |  |
| Murakami, 1996 [S17] | 75, M | No symptoms | Submucosal lesion | 5 | 3 | Trans-anal excision | No LR at 32 months |
|  |  |  |  |  |  |  |  |
| Abel, 1985 (1) [S18] | 52, F | Rectal discomfort | Sessile polyp | NA | 4.5 | Trans-anal excision | NA |
|  |  |  |  |  |  |  |  |
| Abel, 1985 (2) [S18] | 52, M | Rectal discomfort | Protruding mass | NA | 1.5 | Trans-anal excision | NA |
|  |  |  |  |  |  |  |  |
| Catania, 2001 [S19] | 41, M | Tenesmus | Submucosal mass | NA | 8 | Open rectal resection | NA |
|  |  |  |  |  |  |  |  |
| Zibert, 2019 [S20] | 51, F | No symptoms | Submucosal nodule | 4 | 0.7 | ESD | NA |
|  |  |  |  |  |  |  |  |
| Zhang, 2018 [S21] | 61, F | Difficult defecation | Submucosal mass | 6 | 4 | Laparoscopic rectal resection | No LR at 3 months |
|  |  |  |  |  |  |  |  |
| Baskaran, 2014 [S22] | 49, M | Rectal bleeding | Sessile polyps | NA | 0.2-0.3 | ESD | No LR at 6 months |
|  |  |  |  |  |  |  |  |
| Present case | 69, M | No symptoms | Submucosal nodule | 10 | 1.3 | TEM | No LR at 12 months |

*LR*: local recurrence; *TEM*: trans-anal endoscopic microsurgery; *ESD*: endoscopic submucosal dissection.

**Supplementary References**

1. Miettinen M, Shekitka KM, Sobin LH. [Schwannomas in the colon and rectum: a clinicopathologic and immunohistochemical study of 20 cases.](https://www.ncbi.nlm.nih.gov/pubmed/11420455) Am J Surg Pathol 2001; 25(7):846-55.
2. Akgul E, Inal M, Soyupak SK, et al. Benign rectal schwannoma. Eur J Radiol Extra 2003; 45:67–70.
3. Mulchandani MH, Chattopadhyay D, Obafunwa JO, Joypaul VB.Gastrointestinal autonomic nerve tumours - report of a case and review of literature. World J Surg Oncol 2005; 3:46.
4. Lee SH, Kim TO, Hwang SY, et al. A case of rectal schwannoma presenting with hematochezia. Korean J Gastroenterol 2006; 48(3):195-9.
5. Suzuki T, Suwa K, Hada T, et al. [Local excision of rectal schwannoma using transanal endoscopic microsurgery: A case report.](https://www.ncbi.nlm.nih.gov/pubmed/25437674) Int J Surg Case Rep 2014; 5(12):1193-6.
6. Goh BK, Chow PK, Kesavan S, et al. [Intraabdominal schwannomas: a single institution experience.](https://www.ncbi.nlm.nih.gov/pubmed/18074186) J Gastrointest Surg 2008; 12(4):756-60.
7. [Shelat VG](https://www.ncbi.nlm.nih.gov/pubmed/?term=Shelat%20VG%5BAuthor%5D&cauthor=true&cauthor_uid=23971773), [Li K](https://www.ncbi.nlm.nih.gov/pubmed/?term=Li%20K%5BAuthor%5D&cauthor=true&cauthor_uid=23971773), [Naik S](https://www.ncbi.nlm.nih.gov/pubmed/?term=Naik%20S%5BAuthor%5D&cauthor=true&cauthor_uid=23971773), et al.Abdominal schwannomas: case report with literature review. Int Surg 2013; 98(3):214-8.
8. [Kawaguchi S](https://www.ncbi.nlm.nih.gov/pubmed/?term=Kawaguchi%20S%5BAuthor%5D&cauthor=true&cauthor_uid=23363231), [Yamamoto R](https://www.ncbi.nlm.nih.gov/pubmed/?term=Yamamoto%20R%5BAuthor%5D&cauthor=true&cauthor_uid=23363231), [Yamamura M](https://www.ncbi.nlm.nih.gov/pubmed/?term=Yamamura%20M%5BAuthor%5D&cauthor=true&cauthor_uid=23363231), et al.Plexiform schwannoma of the rectum. Dig Endosc 2014; 26(1):113-6.
9. Tan AC, Tan CH, Nandini CL, Ng CY. [Multimodality imaging features of rectal schwannoma.](https://www.ncbi.nlm.nih.gov/pubmed/23138147) Ann Acad Med Singapore 2012; 41(10):476-8.
10. [Vijayasekaran A](https://www.ncbi.nlm.nih.gov/pubmed/?term=Vijayasekaran%20A%5BAuthor%5D&cauthor=true&cauthor_uid=22369805), [Tsikitis VL](https://www.ncbi.nlm.nih.gov/pubmed/?term=Tsikitis%20VL%5BAuthor%5D&cauthor=true&cauthor_uid=22369805), [Gardetto JS](https://www.ncbi.nlm.nih.gov/pubmed/?term=Gardetto%20JS%5BAuthor%5D&cauthor=true&cauthor_uid=22369805), et al.Rectal schwannoma (neurilemmoma). Am Surg 2012; 78(2):84-5.
11. [Tedeschi M](https://www.ncbi.nlm.nih.gov/pubmed/?term=Tedeschi%20M%5BAuthor%5D&cauthor=true&cauthor_uid=21834483), [Cuccia F](https://www.ncbi.nlm.nih.gov/pubmed/?term=Cuccia%20F%5BAuthor%5D&cauthor=true&cauthor_uid=21834483), [Angarano E](https://www.ncbi.nlm.nih.gov/pubmed/?term=Angarano%20E%5BAuthor%5D&cauthor=true&cauthor_uid=21834483), et al.Solitary schwannoma of the rectum mimicking rectal cancer. Report of a case and review of the literature. Ann Ital Chir 2011; 82(4):309-12.
12. [Bhardwaj K](https://www.ncbi.nlm.nih.gov/pubmed/?term=Bhardwaj%20K%5BAuthor%5D&cauthor=true&cauthor_uid=12118926), [Bal MS](https://www.ncbi.nlm.nih.gov/pubmed/?term=Bal%20MS%5BAuthor%5D&cauthor=true&cauthor_uid=12118926), [Kumar P](https://www.ncbi.nlm.nih.gov/pubmed/?term=Kumar%20P%5BAuthor%5D&cauthor=true&cauthor_uid=12118926).Rectal schwannoma. Indian J Gastroenterol 2002; 21(3):116-7.
13. [Maciejewski A](https://www.ncbi.nlm.nih.gov/pubmed/?term=Maciejewski%20A%5BAuthor%5D&cauthor=true&cauthor_uid=11208409), [Lange D](https://www.ncbi.nlm.nih.gov/pubmed/?term=Lange%20D%5BAuthor%5D&cauthor=true&cauthor_uid=11208409), [Włoch J](https://www.ncbi.nlm.nih.gov/pubmed/?term=W%C5%82och%20J%5BAuthor%5D&cauthor=true&cauthor_uid=11208409).Case report of schwannoma of the rectum-clinical and pathological contribution. Med Sci Monit 2000; 6(4):779-82.
14. Hsu KF, Lin CT, Wu CC, et al. [Schwannoma of the rectum: report of a case and review of the literature.](https://www.ncbi.nlm.nih.gov/pubmed/20486757) Rev Esp Enferm Dig 2010; 102(4):289-91.
15. [Zippi M](https://www.ncbi.nlm.nih.gov/pubmed/?term=Zippi%20M%5BAuthor%5D&cauthor=true&cauthor_uid=24303463), [Pica R](https://www.ncbi.nlm.nih.gov/pubmed/?term=Pica%20R%5BAuthor%5D&cauthor=true&cauthor_uid=24303463), [Scialpi R](https://www.ncbi.nlm.nih.gov/pubmed/?term=Scialpi%20R%5BAuthor%5D&cauthor=true&cauthor_uid=24303463), et al.Schwannoma of the rectum: A case report and literature review. World J Clin Cases 2013; 1(1):49-51.
16. [Kakizoe S](https://www.ncbi.nlm.nih.gov/pubmed/?term=Kakizoe%20S%5BAuthor%5D&cauthor=true&cauthor_uid=9684677), [Kuwahara S](https://www.ncbi.nlm.nih.gov/pubmed/?term=Kuwahara%20S%5BAuthor%5D&cauthor=true&cauthor_uid=9684677), [Kakizoe K](https://www.ncbi.nlm.nih.gov/pubmed/?term=Kakizoe%20K%5BAuthor%5D&cauthor=true&cauthor_uid=9684677), et al.Local excision of benign rectal schwannoma using rectal expander-assisted transanal endoscopic microsurgery. Gastrointest Endosc 1998; 48(1):90-2.
17. [Murakami N](https://www.ncbi.nlm.nih.gov/pubmed/?term=Murakami%20N%5BAuthor%5D&cauthor=true&cauthor_uid=8709552), [Tanaka T](https://www.ncbi.nlm.nih.gov/pubmed/?term=Tanaka%20T%5BAuthor%5D&cauthor=true&cauthor_uid=8709552), [Ohmori Y](https://www.ncbi.nlm.nih.gov/pubmed/?term=Ohmori%20Y%5BAuthor%5D&cauthor=true&cauthor_uid=8709552), et al.A case report of rectal schwannoma. Kurume Med J 1996; 43(1):101-6.
18. [Abel ME](https://www.ncbi.nlm.nih.gov/pubmed/?term=Abel%20ME%5BAuthor%5D&cauthor=true&cauthor_uid=4064859), [Nehme Kingsley AE](https://www.ncbi.nlm.nih.gov/pubmed/?term=Nehme%20Kingsley%20AE%5BAuthor%5D&cauthor=true&cauthor_uid=4064859), [Abcarian H](https://www.ncbi.nlm.nih.gov/pubmed/?term=Abcarian%20H%5BAuthor%5D&cauthor=true&cauthor_uid=4064859), et al.Anorectal neurilemomas. Dis Colon Rectum 1985; 28(12):960-1.
19. Catania G, Puleo C, Cardì F, et al. [Malignant schwannoma of the rectum: a clinical and pathological contribution.](https://www.ncbi.nlm.nih.gov/pubmed/11824066) Chir Ital 2001; 53(6):873-7.
20. [Zibert K](https://www.ncbi.nlm.nih.gov/pubmed/?term=Zibert%20K%5BAuthor%5D&cauthor=true&cauthor_uid=29474967), [Richards S](https://www.ncbi.nlm.nih.gov/pubmed/?term=Richards%20S%5BAuthor%5D&cauthor=true&cauthor_uid=29474967), [Darwin P](https://www.ncbi.nlm.nih.gov/pubmed/?term=Darwin%20P%5BAuthor%5D&cauthor=true&cauthor_uid=29474967).A Patient With Rectal Schwannoma. Clin Gastroenterol Hepatol 2019; 17(1):A25-A26.
21. Zhang K, Qu S, Li J, et al. [A case report of rectal schwannoma treated with laparoscopic proctectomy.](https://www.ncbi.nlm.nih.gov/pubmed/29443751) Medicine (Baltimore) 2018; 97(7):e9866.
22. [Baskaran V](https://www.ncbi.nlm.nih.gov/pubmed/?term=Baskaran%20V%5BAuthor%5D&cauthor=true&cauthor_uid=24493106), [Cho WS](https://www.ncbi.nlm.nih.gov/pubmed/?term=Cho%20WS%5BAuthor%5D&cauthor=true&cauthor_uid=24493106), [Perry M](https://www.ncbi.nlm.nih.gov/pubmed/?term=Perry%20M%5BAuthor%5D&cauthor=true&cauthor_uid=24493106).Rectal schwannoma on endoscopic polypectomy. BMJ Case Rep 2014; Feb 3, 2014.
